# Supplementary material
Source: Springer Nature journal article supplement (https://www.springermedizin.de/resource/supplementary/13063_2012_1198_MOESM2_ESM.pdf/9619480)
Supplement: MOESM2 [file 9619480]

Defined the aims and scope of the survey and population of interest

Compiled content of the questionnaire: using evidence based list of potential factors affecting recruitment and providing a mix of open and closed questions

Piloted the survey on a small sample of the population of interest: modifications made as per feedback received

Modified version pretested with senior members of the project team: further changes made

Final version of the survey tested and launched
